# Supplementary material
Source: HighWire-hosted journal article supplement (https://bibliotheek.ehb.be/content/32/1/e101138)
Supplement: inline-supplementary-material-4 [file inline-supplementary-material-4.pdf]

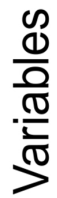

**Supplemental Figure 2** Missing data points in the registry and the biobank of La Paz, Madrid. Missing data points are displayed per variable. Retrieve table 1 and supplemental table 1 to find abbreviations meaning.
